# Supplementary material
Source: HighWire-hosted journal article supplement (http://jpet.aspetjournals.org/highwire/filestream/145326/field_highwire_adjunct_files/0/257931SupplFigures.pdf)
Supplement: 257931SupplFigures.pdf [file 257931SupplFigures.pdf]

## Supplementary Figure 1

H Alganga, T.A.M Almagrouk, O.J. Katwan, C.J. Daly, S Pyne, N J Pyne, & S Kennedy. Short periods of hypoxia upregulate Sphingosine Kinase 1 and increase vasodilation of arteries to Sphingosine 1-Phosphate *via* S1P<sub>3</sub> *Journal of Pharmacology & Experimental Therapeutics*.

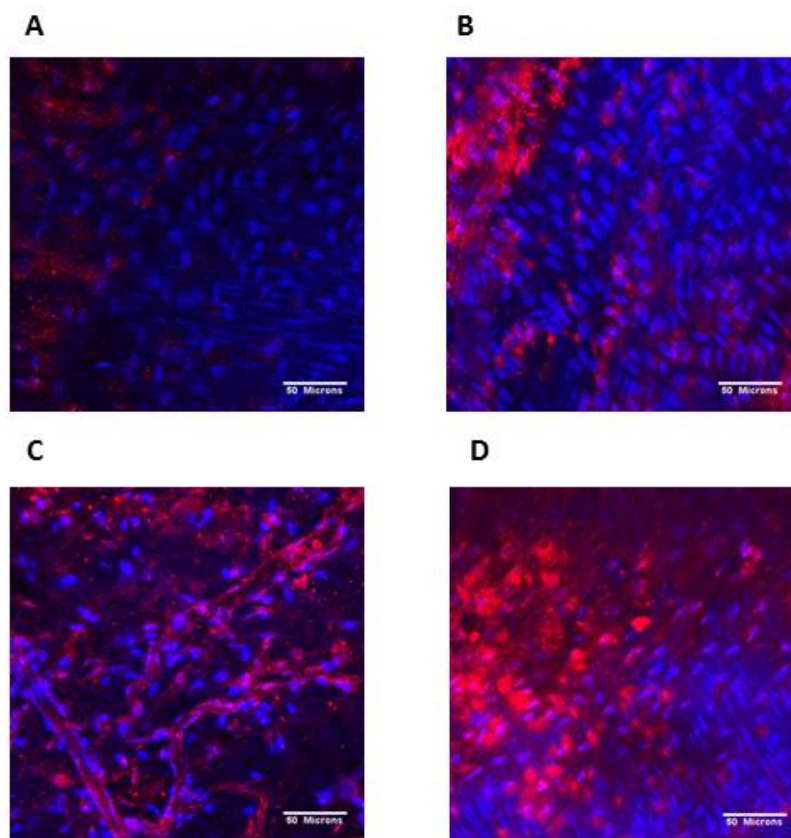

**Supplementary Figure 1** Representative immunofluorescent images showing expression of S1P<sub>3</sub> receptors (panels A and B) and S1P<sub>1</sub> receptors (panels C and D) under normoxia (A and C) or hypoxia (B and D) in rat aortic endothelium. Receptor-associated fluorescence appears red and nuclei appear blue due to addition of Syto 82 nuclear stain. S1P<sub>3</sub> was expressed at a lower level under normoxic conditions compared to S1P<sub>1</sub> while hypoxia increased expression

of both receptors on the endothelium as determined by measuring integrated density (for all conditions at least four images were captured and analysed by a blinded observer).

## Supplementary Figure 2

H Alganga, T.A.M Almagrouk, O.J. Katwan, C.J. Daly, S Pyne, N J Pyne, & S Kennedy. Short periods of hypoxia upregulate Sphingosine Kinase 1 and increase vasodilation of arteries to Sphingosine 1-Phosphate *via* S1P<sub>3</sub> *Journal of Pharmacology & Experimental Therapeutics*.

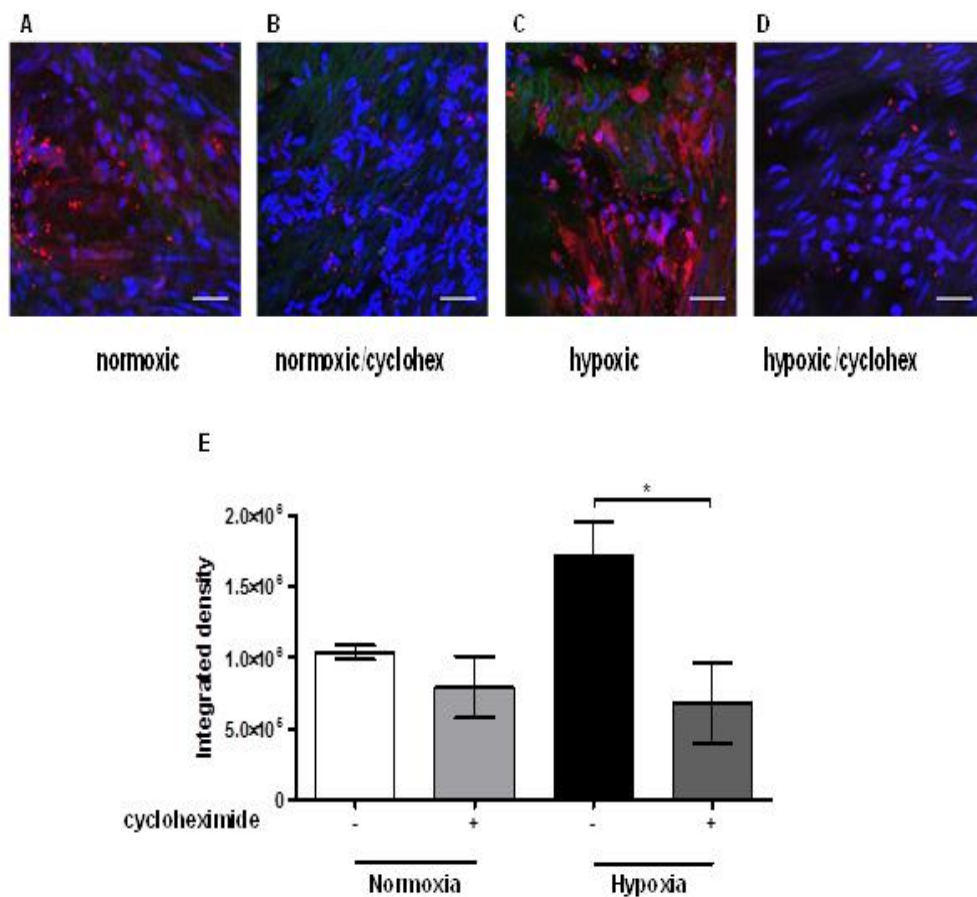

**Supplementary Figure 2** Representative immunofluorescent images showing: (A) expression of SK1 (red) in rat coronary artery endothelium and (B) following pre-treatment with cycloheximide (10  $\mu$ M, 30 min) under normoxic conditions. (C) Expression of SK1 in rat coronary artery subjected to 30 min hypoxia. (D) preincubation of rat coronary artery with

cycloheximide reduced the hypoxia-induced increase in SK1 expression. Nuclei appear blue due to addition of Syto 61 nuclear stain. (E) Quantitative fluorescence measurement of SK1 in the presence and absence of cycloheximide. \* $p < 0.05$  vs hypoxia alone as determined by one way ANOVA with Bonferroni multiple comparison post-tests. Results are representative of 3-5 separate experiments. Scale bar is 30  $\mu\text{m}$ .
